# Supplementary material for: Quantitative Trait Locus Analysis Implicates CD4+/CD44high Memory T Cells in the Pathogenesis of Murine Autoimmune Pancreatitis
Source: PLoS One. 2015 Sep 1;10(9):e0136298. doi: 10.1371/journal.pone.0136298 (PMC4556487; doi:10.1371/journal.pone.0136298)
Supplement: S2 Table — (XLSX) [file pone.0136298.s003.xlsx]

## Sheet: Table S1
Quantitative trait loci for splenocyte subpopulations. Chr: chromosome, CI: confidence interval, MHC II: major histocompatibility complex class II, FoxP3: forkhead box protein P3, IFNγ: interferon γ, IL4: interleukin 4, IL17: interleukin 17, PDCA1: plasmacytoid dendritic cell antigen-1. Cell types were defined as follows: B cells – CD19+, T cells – CD3+, double-positive (DP) T cells – CD4+/CD8+, …
Cell Type	Subtype I	Subtype II	Marker	Chr	Peak (Mbp)	CI (Mbp)	-log10(p)
B cells			CD19+/CD69-	2	79.2	77.5-84.6	5.4
B cells			CD19+/CD69-	2	100.2	95.9-107.3	4.3
B cells			CD19+/CD69-	3	14.9	3.8-27.5	4.3
B cells			CD19+/CD69-	3	137.7	131.3-142.7	4.3
B cells			CD19+/CD69-	3	148	145.9-156.8	6.8
B cells			CD19+/CD69-	4	151.4	142.8-153.8	4.9
B cells			CD19+/CD69-	5	54	51.1-57.9	6
B cells			CD19+/CD69-	5	73.2	61.9-74.8	5.7
B cells			CD19+/CD69-	5	96.6	96.6-97.1	4.6
B cells			CD19+/CD69-	6	37.5	29.4-40.7	4.1
B cells			CD19+/CD69-	6	45.2	43.8-45.4	6.2
B cells			CD19+/CD69-	6	53.7	49-63.8	4.2
B cells			CD19+/CD69-	6	135.3	134.2-142.4	4.6
B cells			CD19+/CD69-	7	88.3	85.4-91.4	5.6
B cells			CD19+/CD69-	7	100.1	94.3-103.3	4.6
B cells			CD19+/CD69-	7	116.6	109.4-119.1	4.5
B cells			CD19+/CD69-	7	142.3	142.3-146.5	4.8
B cells			CD19+/CD69-	8	58.9	53.5-63.7	4.3
B cells			CD19+/CD69-	8	68.1	66.6-72.5	5.3
B cells			CD19+/CD69-	8	95.1	88.1-97.2	4.2
B cells			CD19+/CD69-	9	40.5	37.7-42.8	8.9
B cells			CD19+/CD69-	9	85	79.9-87.8	8
B cells			CD19+/CD69-	9	111.8	105.4-113.2	5.5
B cells			CD19+/CD69-	16	4.3	9.6-102.8	4.9
B cells			CD19+/CD69-	20	36.3	9.1-45.5	4.7
B cells			CD19+/CD69-	20	104	99.3-123	10.5
B cells			CD19+/CD69+	1	181.5	173.2-181.5	5.6
B cells			CD19+/CD69+	1	181.5	173.2-181.5	5.6
B cells			CD19+/CD69+	2	108.3	92.7-115.7	5.8
B cells			CD19+/CD69+	2	111.9	92.7-115.7	5.8
B cells			CD19+/CD69+	8	26.6	16.5-32.4	4
B cells			CD19+/CD69+	8	26.6	16.5-32.4	4
B cells			CD19+/CD69+	14	8.9	8.9-13.1	4.5
B cells			CD19+/CD69+	14	11.6	8.9-11.6	4.5
B cells			CD19+/CD69+	14	18.2	13.4-24.6	6.1
B cells			CD19+/CD69+	14	18.2	13.1-24.6	6.1
B cells			CD19+/CD69+	14	36.2	27.2-42	4
B cells			CD19+/CD69+	14	36.2	27.2-42	4
B cells			CD19+/CD86-	5	54	44.7-57.9	5.4
B cells			CD19+/CD86-	5	73.2	70.8-77.9	5.6
B cells			CD19+/CD86-	5	96.6	96.6-97.1	5
B cells			CD19+/CD86-	6	45.2	43.8-49	4.3
B cells			CD19+/CD86-	6	63.8	51.1-69.7	4.1
B cells			CD19+/CD86-	7	142.3	142.3-146.5	5.2
B cells			CD19+/CD86-	9	40.5	39.5-42.8	7.6
B cells			CD19+/CD86-	9	86.2	78.5-87.8	5.3
B cells			CD19+/CD86-	9	94.2	90.6-99.8	4.2
B cells			CD19+/CD86-	16	4.3	4.3-12.5	4.2
B cells			CD19+/CD86-	20	81.8	78.6-82.7	4.9
B cells			CD19+/CD86-	20	106.1	93.4-131.5	6.2
B cells			CD19+/MCH Class II-	2	71.4	63-73.3	4.5
B cells			CD19+/MCH Class II-	2	142.2	131.8-147.9	6.6
B cells			CD19+/MCH Class II-	3	97.1	83.3-100.5	4.4
B cells			CD19+/MCH Class II-	4	40.4	32.3-51.8	4.6
B cells			CD19+/MCH Class II-	17	36.7	36-39.1	32.5
B cells			CD19+/MCH Class II+	2	71.4	68.1-81.9	5.2
B cells			CD19+/MCH Class II+	2	103.7	96.7-108.3	4.5
B cells			CD19+/MCH Class II+	3	14.9	3.8-26.5	4.5
B cells			CD19+/MCH Class II+	3	148	145.9-156.8	4.2
B cells			CD19+/MCH Class II+	5	54	46.5-57.9	5.1
B cells			CD19+/MCH Class II+	5	73.2	60.6-77.9	4.1
B cells			CD19+/MCH Class II+	6	45.2	43.8-45.4	6.5
B cells			CD19+/MCH Class II+	6	136.3	131.3-147.2	4.2
B cells			CD19+/MCH Class II+	7	88.3	85.4-102.7	4.6
B cells			CD19+/MCH Class II+	7	142.3	142.3-146.5	5.2
B cells			CD19+/MCH Class II+	8	6.8	6.8-6.8	4.7
B cells			CD19+/MCH Class II+	8	59.8	53.5-64.5	3.9
B cells			CD19+/MCH Class II+	8	69.6	66.6-78.2	4.8
B cells			CD19+/MCH Class II+	8	95.1	89.3-97.2	5.2
B cells			CD19+/MCH Class II+	9	40.5	39.5-42.8	7.3
B cells			CD19+/MCH Class II+	9	86.2	79.9-87.8	5.6
B cells			CD19+/MCH Class II+	9	92.1	90.6-96.3	4.3
B cells			CD19+/MCH Class II+	11	76.4	70-86.8	4
B cells			CD19+/MCH Class II+	15	102.8	102.8-102.8	4.3
B cells			CD19+/MCH Class II+	16	4.3	4.3-12.5	4.1
B cells			CD19+/MCH Class II+	17	36	33.2-41.1	8.6
B cells			CD19+/MCH Class II+	18	63.4	53.3-66.6	4.3
B cells			CD19+/MCH Class II+	18	88.8	88.8-88.8	4
B cells			CD19+/MCH Class II+	20	36.3	9.1-45.5	4.3
B cells			CD19+/MCH Class II+	20	104	98-112.6	10
T cells	cytotoxic T cells		CD8+/CD44low	2	100.2	96.7-103.7	10
T cells	cytotoxic T cells		CD8+/CD44low	4	102.7	101.1-122.6	6.1
T cells	cytotoxic T cells		CD8+/CD44low	4	141.1	136.2-147.3	6.1
T cells	cytotoxic T cells		CD8+/CD44low	9	18.9	12.4-27.9	3.9
T cells	cytotoxic T cells		CD8+/CD44low	12	37.7	30.6-37.7	4.8
T cells	cytotoxic T cells		CD8+/CD44low	12	41.2	41.2-49	4.7
T cells	cytotoxic T cells		CD8+/CD44low	12	59.1	51.4-74	3.9
T cells	cytotoxic T cells		CD8+/CD44low	12	91.4	88.4-95.6	4.4
T cells	cytotoxic T cells		CD8+/CD44low	20	33.5	9.6-39.6	8.2
T cells	cytotoxic T cells		CD8+/CD44low	20	68.7	45-87.4	4.8
T cells	cytotoxic T cells		CD8+/CD44low	20	99.3	97-106.1	7.9
T cells	cytotoxic T cells		CD8+/CD44high	2	68.1	61.6-73.3	5.9
T cells	cytotoxic T cells		CD8+/CD44high	2	111.9	103.7-115.7	8.7
T cells	cytotoxic T cells		CD8+/CD62L+	3	95.5	83.3-97.1	4.7
T cells	cytotoxic T cells		CD8+/CD62L+	4	122.6	102.7-123.9	4.7
T cells	cytotoxic T cells		CD8+/CD62L+	9	12.4	10.6-24.8	4.8
T cells	cytotoxic T cells		CD8+/CD62L+	12	91.4	88.4-93.2	4.2
T cells	cytotoxic T cells		CD8+/CD62L+	20	33.5	9.6-45.5	7.1
T cells	cytotoxic T cells		CD8+/CD62L+	20	100.9	98-108.6	5.4
T cells	cytotoxic T cells		CD8+/CD62L+	20	123	109.7-132.3	4.1
T cells	cytotoxic T cells		CD3+/CD8+	1	133.4	128.5-139.3	5
T cells	cytotoxic T cells		CD3+/CD8+	12	34.9	30.9-37.7	4.9
T cells	cytotoxic T cells		CD3+/CD8+	12	41.2	41.2-74	5.2
T cells	cytotoxic T cells		CD3+/CD8+	12	91.4	75.8-99.3	4.3
T cells	cytotoxic T cells		CD3+/CD8+	20	9.6	9.1-48.3	4.7
T cells	cytotoxic T cells		CD3+/CD8+	20	100.9	97-106.1	5.3
T cells	cytotoxic T cells		CD3+/CD8+	20	123	107.8-132.8	4
T cells	cytotoxic T cells		CD8+/CD69-	20	33.5	9.6-49.3	4.7
T cells	cytotoxic T cells		CD8+/CD69+	1	42.5	39.1-74.5	4.2
T cells	cytotoxic T cells		CD8+/CD69+	1	181.5	177.9-182.5	5.9
T cells	cytotoxic T cells		CD8+/CD69+	2	65	65-66.8	6.4
T cells	cytotoxic T cells		CD8+/CD69+	2	80.5	77.5-81.9	6
T cells	cytotoxic T cells		CD8+/CD69+	2	96.7	92.7-96.7	9.8
T cells	cytotoxic T cells		CD8+/CD69+	2	161.2	150.9-163	5.1
T cells	cytotoxic T cells		CD8+/CD69+	3	142.7	142.7-142.7	5.3
T cells	cytotoxic T cells		CD8+/CD69+	3	151.2	149.8-156.8	4.9
T cells	cytotoxic T cells		CD8+/CD69+	4	38.3	30.9-40.4	6.8
T cells	cytotoxic T cells		CD8+/CD69+	4	136.2	132.8-142.8	5.1
T cells	cytotoxic T cells		CD8+/CD69+	4	154.6	153.8-154.6	4.5
T cells	cytotoxic T cells		CD8+/CD69+	5	40.2	40.2-41.4	5.8
T cells	cytotoxic T cells		CD8+/CD69+	5	46.5	46.5-47.6	5.3
T cells	cytotoxic T cells		CD8+/CD69+	5	104.4	98.3-111.8	4.2
T cells	cytotoxic T cells		CD8+/CD69+	6	56.3	53.7-63.8	4.2
T cells	cytotoxic T cells		CD8+/CD69+	6	79.8	65.1-85.9	4.8
T cells	cytotoxic T cells		CD8+/CD69+	7	81.2	79.8-89.4	4.8
T cells	cytotoxic T cells		CD8+/CD69+	7	114.2	107.2-114.7	4.2
T cells	cytotoxic T cells		CD8+/CD69+	8	26.6	22-32.4	6.3
T cells	cytotoxic T cells		CD8+/CD69+	11	12.2	7.5-26.5	4.7
T cells	cytotoxic T cells		CD8+/CD69+	11	31	30.3-38.4	7.5
T cells	cytotoxic T cells		CD8+/CD69+	14	119.4	112.3-120.4	5.7
T cells	cytotoxic T cells		CD8+/CD69+	17	6	6-9.2	10.8
T cells	cytotoxic T cells		CD8+/CD69+	18	70.3	68.8-71.6	4.4
T cells	cytotoxic T cells		CD8+/CD69+	19	42.5	37.3-42.5	5.9
T cells	cytotoxic T cells		CD8+/CD69+	19	46.1	45.4-48.2	5.7
T cells	cytotoxic T cells		CD8+/FoxP3-	7	135.6	126.4-140.2	4.2
T cells	cytotoxic T cells		CD8+/FoxP3-	12	91.4	83.3-95.6	5.6
T cells	cytotoxic T cells		CD8+/FoxP3-	14	69	67.6-80.2	4.5
T cells	cytotoxic T cells		CD8+/FoxP3-	20	100.9	99.3-108.6	5.7
T cells	cytotoxic T cells		CD8+/FoxP3-	20	123	109.7-132.8	4.2
T cells	DP T cells		CD4+/CD8+	3	154.5	151.2-156.8	4.9
T cells	DP T cells		CD4+/CD8+	7	6.9	4.3-10.7	5
T cells	DP T cells		CD4+/CD8+	13	42.9	37.6-47.9	4.3
T cells	DP T cells		CD4+/CD8+	20	93.4	91.2-106.1	4.7
T cells	T helper cells	Th1	CD4+/IFNγ+	4	3.6	3.6-10.8	10.5
T cells	T helper cells	Th1	CD4+/IFNγ+	4	122.6	122.6-122.6	7.1
T cells	T helper cells	Th1	CD4+/IFNγ+	8	22	6.8-32.4	5.4
T cells	T helper cells	Th1	CD4+/IFNγ+	9	69.8	68-85	5.8
T cells	T helper cells	Th1	CD4+/IFNγ+	9	106.2	106.2-111.8	7.7
T cells	T helper cells	Th1	CD4+/IFNγ+	10	60.6	46.7-65.9	4.4
T cells	T helper cells	Th1	CD4+/IFNγ+	11	65	61.3-73.1	4.2
T cells	T helper cells	Th1	CD4+/IFNγ+	14	120.4	119.4-120.4	5.6
T cells	T helper cells	Th1	CD4+/IFNγ+	17	3.4	3.4-4	6.7
T cells	T helper cells	Th1	CD4+/IFNγ+	17	21	17.8-27.6	5.3
T cells	T helper cells	Th1	CD4+/IFNγ+	17	41.8	39.1-44	4.2
T cells	T helper cells	Th1	CD4+/IFNγ+	18	68.8	66.6-70.3	6.1
T cells	T helper cells	Th2	CD4+/IL4+	2	79.2	77.5-100.2	4.4
T cells	T helper cells	Th2	CD4+/IL4+	4	127.7	123.9-127.7	4.7
T cells	T helper cells	Th2	CD4+/IL4+	8	129.1	124.9-129.1	6.3
T cells	T helper cells	Th2	CD4+/IL4+	11	70	70-92.3	4.3
T cells	T helper cells	Th17	CD4+/IL17+	1	72	58.4-73	4.2
T cells	T helper cells	Th17	CD4+/IL17+	4	10.8	3.6-18	6
T cells	T helper cells	Th17	CD4+/IL17+	4	30.9	19.5-40.4	4.8
T cells	T helper cells	Th17	CD4+/IL17+	6	125	125-130.2	4.5
T cells	T helper cells	Th17	CD4+/IL17+	9	92.1	92.1-105.4	5.4
T cells	T helper cells	Th17	CD4+/IL17+	18	68.8	66.6-70.3	9.6
T cells	T helper cells	Th17	CD4+/IL17+	20	100.9	93.4-131.5	4.2
T cells	T helper cells	Th17	CD4+/IL17+	20	153.7	137.2-156.6	5.4
T cells	T helper cells	others	CD3+/CD4+	6	136.3	133.9-139.8	5.2
T cells	T helper cells	others	CD3+/CD4+	7	119.1	109.4-140.2	3.9
T cells	T helper cells	others	CD3+/CD4+	12	14.9	10-28.7	4.8
T cells	T helper cells	others	CD3+/CD4+	12	34.9	29.7-37.7	4.3
T cells	T helper cells	others	CD3+/CD4+	17	82.9	79.2-89.3	3.9
T cells	T helper cells	others	CD4+/CD69-	6	138.2	135.3-139.8	4.4
T cells	T helper cells	others	CD4+/CD69-	12	17.6	11.9-37.7	4
T cells	T helper cells	others	CD4+/CD69-	12	59.1	49-70.7	4.4
T cells	T helper cells	others	CD4+/CD69-	17	82.9	79.2-89.3	4
T cells	T helper cells	others	CD4+/CD69-	20	45.5	9.6-48.7	4
T cells	T helper cells	others	CD4+/CD8-	1	29.8	25.9-41	4
T cells	T helper cells	others	CD4+/CD8-	6	136.3	135.3-139.8	5.5
T cells	T helper cells	others	CD4+/CD8-	12	16.6	10-25.4	4.8
T cells	T helper cells	others	CD4+/CD8-	12	34.9	28.7-37.7	4.1
T cells	T helper cells	others	CD4+/CD8-	17	82.9	81.4-83.9	4.5
T cells	T helper cells	others	CD4+/CD44low	2	107.3	100.2-108.3	14.2
T cells	T helper cells	others	CD4+/CD44low	4	141.1	141.1-142.8	5.1
T cells	T helper cells	others	CD4+/CD44low	8	129.1	124.9-129.1	4.1
T cells	T helper cells	others	CD4+/CD44low	17	87.2	83.9-89.3	4
T cells	T helper cells	others	CD4+/CD44high	2	68.1	59.9-71.4	9.6
T cells	T helper cells	others	CD4+/CD44high	6	27.9	18.5-51.1	3.8
T cells	T helper cells	others	CD4+/CD44high	6	57.1	53.7-111.3	4.7
T cells	T helper cells	others	CD4+/CD44high	6	138.2	131.3-144.3	4.1
T cells	T helper cells	others	CD4+/CD44high	13	45.5	40.1-47.9	4.5
T cells	T helper cells	others	CD4+/CD44high	15	11.2	8.4-15.5	6.3
T cells	T helper cells	others	CD4+/CD44high	19	11.4	10.5-18.6	5.7
T cells	T helper cells	others	CD4+/CD44high	19	26.8	20.1-32.4	4.5
T cells	T helper cells	others	CD4+/CD62L-	2	130	127.6-152.4	4
T cells	T helper cells	others	CD4+/CD62L-	2	159.5	156.1-161.2	4.9
T cells	T helper cells	others	CD4+/CD62L-	3	69.5	66.5-88.7	3.9
T cells	T helper cells	others	CD4+/CD62L-	3	91.9	90-100.5	6.5
T cells	T helper cells	others	CD4+/CD62L-	12	17.6	11.9-30.9	4.5
T cells	T helper cells	others	CD4+/CD62L+	2	92.7	87.2-115.7	4.4
T cells	T helper cells	others	CD4+/CD62L+	2	130	127.6-149.7	4.5
T cells	T helper cells	others	CD4+/CD62L+	5	120.3	120.3-130.8	4.1
T cells	T helper cells	others	CD4+/CD62L+	11	38.4	31-41.1	4.1
T cells	T helper cells	others	CD4+/CD62L+	17	29.9	25.6-64.1	4
T cells	T helper cells	others	CD4+/CD62L+	17	81.4	79.2-89.3	4.9
T cells	T helper cells	others	CD4+/FoxP3-	3	154.5	151.2-156.8	4
T cells	T helper cells	others	CD4+/FoxP3-	7	135.6	126.4-140.2	4.2
T cells	T helper cells	others	CD4+/FoxP3-	11	22.7	18-38.4	4.2
T cells	T helper cells	others	CD4+/FoxP3-	17	12.5	12.5-39.1	4
T cells	T helper cells	others	CD4+/IFNγ-	1	30.9	22.7-41	4.2
T cells	T helper cells	others	CD4+/IFNγ-	7	131.8	116.6-140.2	4.4
T cells	T helper cells	others	CD4+/IFNγ-	19	10.5	6.2-11.4	5.3
T cells	T helper cells	others	CD4+/IFNγ-	19	23.7	21.9-32.4	3.9
T cells	Tregs		CD4+/FoxP3+	2	59.9	56.4-73.3	7
T cells	Tregs		CD4+/FoxP3+	2	92.7	85.5-115.7	5.3
T cells	Tregs		CD4+/FoxP3+	2	147.9	147.9-150.9	4.3
T cells	Tregs		CD4+/FoxP3+	2	164.1	163-171.2	4.3
T cells	Tregs		CD4+/FoxP3+	4	154.6	142.8-155.6	4.5
T cells	Tregs		CD4+/FoxP3+	7	79.8	76.9-109.4	4
T cells	Tregs		CD4+/FoxP3+	7	124.4	114.2-126.4	5.7
T cells	Tregs		CD4+/FoxP3+	9	86.2	86.2-87.8	8.9
T cells	Tregs		CD4+/FoxP3+	11	72.6	72.6-76.4	3.9
T cells	Tregs		CD4+/FoxP3+	13	19.2	15.5-26	4.9
T cells	Tregs		CD4+/FoxP3+	13	47.9	43.3-47.9	4.8
T cells	Tregs		CD4+/FoxP3+	15	101.4	95.1-102.8	5.2
T cells	Tregs		CD4+/FoxP3+	16	4.3	4.3-8	6
T cells	Tregs		CD4+/FoxP3+	17	63.1	55.4-74.6	5.4
T cells	Tregs		CD4+/FoxP3+	19	59.4	59.4-59.4	9.7
T cells	Tregs		CD4+/FoxP3+	20	156.6	137.2-161.9	4
T cells	Tregs		CD8+/FoxP3+	2	59.9	56.4-61.6	6.3
T cells	Tregs		CD8+/FoxP3+	2	100.2	88.8-114.2	6.8
T cells	Tregs		CD8+/FoxP3+	2	130	127.6-136.7	4.3
T cells	Tregs		CD8+/FoxP3+	6	63.8	60.5-69.7	5
T cells	Tregs		CD8+/FoxP3+	6	97.9	84.8-98.4	4.1
T cells	Tregs		CD8+/FoxP3+	7	103.3	102.7-108.9	4.9
T cells	Tregs		CD8+/FoxP3+	7	124.4	119.1-126.4	4.9
T cells	Tregs		CD8+/FoxP3+	9	87.8	86.2-87.8	5.1
T cells	Tregs		CD8+/FoxP3+	9	94.2	90.6-96.3	4.3
T cells	Tregs		CD8+/FoxP3+	15	101.4	101.4-101.4	5.4
T cells	others		CD3+/B220-	12	34.9	10.6-37.7	5.1
T cells	others		CD3+/B220-	12	68.9	40.7-79.7	4.8
T cells	others		CD3+/B220-	20	45.5	9.1-49.3	4.1
T cells	others		CD3+/B220+	2	111.9	95.9-122.1	4.6
T cells	others		CD3+/B220+	2	142.2	127.6-147.9	4.7
T cells	others		CD3+/B220+	4	127.7	111.3-127.7	4.4
T cells	others		CD3+/B220+	9	94.2	92.1-117.8	4.2
T cells	others		CD3+/B220+	10	86.1	85.3-89.1	5.8
T cells	others		CD3+/B220+	16	79.5	72.5-84.6	4.6
T cells	others		CD3+/CD4-	1	133.4	128.5-139.3	5.3
T cells	others		CD3+/CD4-	6	89.6	78.2-106.3	4.1
T cells	others		CD3+/CD4-	12	41.2	30.9-74	5.8
T cells	others		CD3+/CD4-	12	88.4	83.3-99.3	5.1
T cells	others		CD3+/CD4-	20	9.6	9.1-49.3	4.2
T cells	others		CD3+/CD4-	20	100.9	97-108.6	4.5
T cells	others		CD3+/CD8-	6	136.3	135.3-139.8	5.5
T cells	others		CD3+/CD8-	7	124.4	109.4-135.6	4.3
T cells	others		CD3+/CD8-	12	14.9	10-17.6	5.2
T cells	others		CD3+/CD8-	12	34.9	25.4-37.7	4.4
DCs	PD cells		CD86-/PDCA1+	14	89.3	81.8-100.2	4.9
DCs	PD cells		CD86-/PDCA1+	16	66.3	61-76.9	6.3
DCs	PD cells		CD86-/PDCA1+	18	71.6	68.8-74.9	5.4
DCs	PD cells		CD86+/PDCA1+	10	64	53.5-65.9	6.4
DCs	PD cells		CD11c+/PDCA1+	9	79.9	57.7-86.2	4.8
DCs	PD cells		CD11c+/PDCA1+	9	90.6	87.8-92.1	4.1
DCs	PD cells		CD11c+/PDCA1+	9	117.8	117.8-117.8	6
DCs	cDCs		CD11c+/CD86-	12	117.4	109.9-119	4.4
DCs	cDCs		CD11c+/CD86-	18	12.3	9.3-14.7	5.6
DCs	cDCs		CD11c+/CD86+	10	60.6	48.4-67.3	4.7
DCs	cDCs		CD11c+/PDCA1-	1	20.8	16.3-39.1	4
DCs	cDCs		CD11c+/PDCA1-	7	124.4	121.5-126.4	4.1
DCs	cDCs		CD11c+/PDCA1-	7	135.6	135.1-140.2	4.9
DCs	cDCs		CD11c+/PDCA1-	18	12.3	5.4-14.7	6.1
DCs	cDCs		CD11c+/PDCA1-	18	31.1	15.2-54.6	4.1
